# Supplementary material for: Sperm removal during copulation confirmed in the oldest extant damselfly, Hemiphlebia mirabilis
Source: PeerJ. 2016 May 24;4:e2077. doi: 10.7717/peerj.2077 (PMC4888289; doi:10.7717/peerj.2077)
Supplement: Supplemental Information 1 [file peerj-04-2077-s001.xlsx]

## Sheet: Cópulas
Date	Place	male	female	mating	start interaction	temperature	start tandem	Courtship	tandem duration	Tandem duration	Sperm transfer (s)	Start copula	Start stage II	End copula	Copula duration	Stage I duration	Stage II duration	Treatment	Bursa area	Sperm volume
2013-11-29	insectary	NM	518 (ACR-00751)	yes	15:15:00		15:18:49	00:03:49		00:01:05	6	15:19:54	15:28:00					End stage I	0.026	0.0026
2013-12-01	insectary	702	712 (ACR-00769)	yes	12:06:00	30.4	12:09:09	00:03:09		00:00:59	3	12:10:08	12:15:00					End stage I	0.029	0.0029
2013-12-01	insectary	406	197	yes	13:29:00	27.3	13:31:47	00:02:47		00:00:52	3	13:32:39	13:36:00					End stage I
2013-12-01	insectary	711	705	yes	13:57:00	30.6	14:00:56	00:03:56		00:00:46	3	14:01:42	14:08:05					End stage I
2013-12-01	insectary	357	720 (ACR-00765)	yes	14:12:00	30.6	14:15:51	00:03:51		00:01:02	2	14:16:53	14:23:00					End stage I	0.014	0.0014
2013-12-03	insectary	589	273 (ACR-00781)	yes	12:07:00		12:11:28	00:04:28		00:00:07	3	12:11:35	12:23:30					End stage I	0
2013-12-03	insectary	.6	72 (ACR-00785)	yes	12:54:00	28.8	12:59:22			00:02:11	5	13:01:33	13:09:15					End stage I	0.023	0.0023
2013-12-03	insectary	.22	.55 (ACR-00784)	yes														End stage I	0.109	0.0109
2013-12-03	insectary	.41	327 (ACR-00780)	yes	13:59:00	28.7	14:06:00	00:07:00		00:03:05	4	14:09:05	14:13:08					End stage I	0.044	0.0044
2013-12-03	insectary	591	.37 (ACR-00782)	yes	14:20:00	28.5	14:28:03	00:08:03		00:01:04	3	14:29:07	14:35:20					End stage I	0
2013-12-03	insectary	NM	.34	yes	14:37:00	28.9	14:39:31			00:00:31	3	14:40:02	14:43:10					End stage I
2013-11-25	field	NM	ACR-00717	yes		24.2	16:13:00			00:02:00	5	16:15:00	16:31:00	16:31:37	00:16:37	00:16:00	00:00:37	Postcopula
2013-11-26	field	NM	ACR-00720	yes		19.2	10:40:00			00:08:08	3	10:48:08		10:55:40	00:07:32			Postcopula	0.111	0.0111
2013-11-29	insectary	NM	159 (ACR-00755)	yes	12:50:00		12:52:51	00:02:51		00:01:01	6	12:53:52	12:58:00	12:59:00	00:05:08	00:04:08	00:01:00	Postcopula	0
2013-11-29	insectary	345	360 (ACR-00753)	yes	15:49:00		16:12:00	00:23:00		00:01:25	4	16:13:25	16:25:42	16:27:30	00:14:05	00:12:17	00:01:48	Postcopula	0.148	0.0148
2013-11-30	insectary	318	250 (ACR-00763)	yes	12:22:00	26.7	12:28:59	00:06:59		00:02:01	3	12:31:00	12:37:20	12:38:38	00:07:38	00:06:20	00:01:18	Postcopula	0.19	0.019
2013-11-30	insectary	NM	333 (ACR-00762)	yes	13:08:00	26.8	13:10:14			00:00:39	4	13:10:53	13:19:30	13:20:55	00:10:02	00:08:37	00:01:25	Postcopula	0.205	0.0205
2013-11-30	insectary	589	595 (ACR-00757)	yes	13:24:00	26.8	13:39:40	00:15:40		00:00:57	3	13:40:37	13:54:27	13:55:55	00:15:18	00:13:50	00:01:28	Postcopula	0.139	0.0139
2013-11-30	insectary	318	617 (ACR-00760)	yes	16:17:00	26.8	16:23:45	00:06:45		00:00:59	4	16:24:44	16:31:32	16:32:43	00:07:59	00:06:48	00:01:11	Postcopula	0.057	0.0057
2013-12-01	insectary	NM	724 (ACR-00766)	yes	14:38:00	30.1	14:45:22	00:07:22		00:01:11	2	14:46:33		14:53:29	00:06:56			Postcopula	0
2013-12-06	field	593	NM (ACR-00786)	yes	16:00:00	18.6	16:04:35	00:04:35		00:01:03	3	16:05:38	16:10:53	16:11:37	00:05:59	00:05:15	00:00:44	Postcopula	0.137	0.0137
2013-11-19	field	focal	NM	yes		18.7	09:30:00			00:01:00		09:31:00	09:42:29	09:43:00	00:12:00	00:11:29	00:00:31
2013-11-26	field	NM	176	yes		28.6	11:43:41			00:00:43	1	11:44:24					00:00:35
2013-11-30	insectary	578	596	yes	12:05:00	26.7	12:06:40	00:01:40		00:01:00	4	12:07:40
2013-12-01	insectary	703	717	yes	13:41:00						2	13:37:10	13:41:00
2013-12-03	field	NM	NM	yes	15:48:00	21	15:53:27	00:05:27		00:00:47	5	15:54:14	16:01:30	16:02:40	00:08:26	00:07:16	00:01:10
2013-12-06	field	NM	83	yes	17:02:00	19.8	17:05:00	00:03:00		00:01:55	3	17:06:55	17:15:44	17:16:52	00:09:57	00:08:49	00:01:08
2013-12-07	field	NM	NM	yes	14:46:00	21.3	14:49:21	00:03:21		00:00:31	3	14:49:52	15:08:31	15:09:36	00:19:44	00:18:39	00:01:05
			mean		14:07:13.043000	25.8682	13:53:49.654000	6.19561		1.42436	3.46154	13:54:34.926000	14:18:47.217000	14:28:30.857000	10.525	9.95556	1.07692
			N		23	22	26	19		26	26	27	23	14	14	12	13
			SE		00:17:56.622000	0.88556	00:22:09.814000	1.17457		0.295119	0.236843	00:21:16.178000	00:22:08.073000	00:36:52.279000	1.17402	1.30372	0.106092
			max		17:02:00	30.6	17:05:00	23		8.13333	6	17:06:55	17:15:44	17:16:52	19.7333	18.65	1.8
			min		12:05:00	18.6	09:30:00	1.66667		0.116667	1	09:31:00	09:42:29	09:43:00	5.13333	4.13333	0.516667
2013-11-26			ACR-00719	no														precopula	0.076	0.0076
2013-11-26			ACR-00722	no														precopula	0
2013-11-29			ACR-00770	no														precopula	0.129	0.0129
2013-11-29			ACR-00771	no														precopula	0.111	0.0111
2013-11-29			ACR-00772	no														precopula	0
2013-12-06			ACR-00797	no														precopula	0.104	0.0104
2013-11-27			ACR-00724	no														precopula	0.125	0.0125
2013-11-30	insectary	589	598	no	12:57:00		13:03:11		00:06:11		3
2013-11-30	insectary	589	603	no	15:23:00
2013-12-01	insectary	20	675	no	12:32:00	30.4	12:47:30		00:15:30		2
2013-12-03	insectary	.13	327	no	11:52:00		11:58:51		00:06:51								Treatment	Sperm volume	SE	Sample size
2013-12-03	field	534	.17	no	14:52:00		14:57:00		00:05:00								Precopula	0.0109	0.000941807	5
2013-12-03	insectary	.50	.7	no	15:25:00		15:29:04										End stage I	0.00408333	0.00142066	6
								mean	8.38333								Postcopula	0.0141	0.00185947	7
								desvest	4.80573
								SE	2.40286
